# Supplementary material for: Imidazole-containing cyanostilbene-based molecules with aggregation-induced emission characteristics: photophysical and electroluminescent properties
Source: Royal Society of Chemistry journal article supplement (doi:10.1039/c8nj04512g), 2018-12-04
Supplement: c8nj04512g1.pdf [file c8nj04512g1.pdf]

## Supporting information

### **Imidazole-containing cyanostilbene-based molecules with aggregation-induced emission characteristics: photophysical and electroluminescent properties**

Yujie Dong,<sup>a,b</sup> Jingyu Qian,<sup>c</sup> Yang Liu,<sup>c</sup> Nianyong Zhu,<sup>b</sup> Bin Xu,<sup>c</sup> Cheuk-Lam Ho,<sup>\*d</sup> Wenjing Tian<sup>\*c</sup> and Wai-Yeung Wong<sup>\*b,d</sup>

<sup>a</sup> State Key Laboratory Breeding Base of Green Chemistry Synthesis Technology, College of Chemical Engineering, Zhejiang University of Technology, Hangzhou 310014, P. R. China.

<sup>b</sup> Institute of Molecular Functional Materials, Department of Chemistry and Institute of Advanced Materials, Hong Kong Baptist University, Hong Kong, P. R. China.

<sup>c</sup> State Key Laboratory of Supramolecular Structure and Materials, Jilin University, Qianjin street No.2699, Changchun 130012, China. E-mail: wjtian@jlu.edu.cn.

<sup>d</sup> Department of Applied Biology & Chemical Technology, The Hong Kong Polytechnic University, Hung Hom, Hong Kong, P. R. China. E-mail: cheuk-lam.ho@polyu.edu.hk; wai-yeung.wong@polyu.edu.hk

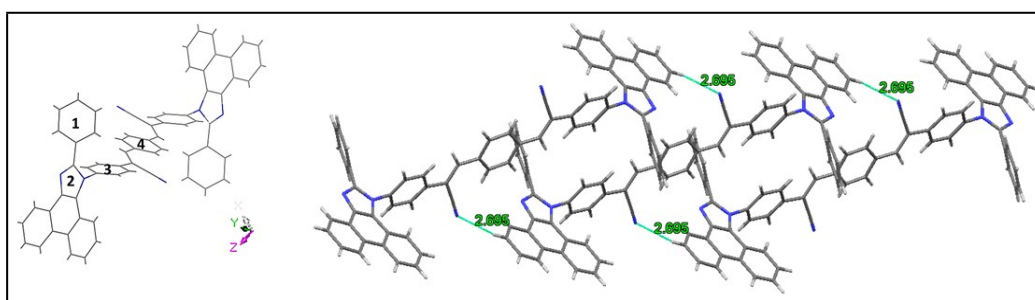

**Fig. S1** Molecular structure and packing mode of **PPIA** in the crystal.

**Table S1** Selected dihedral angle (deg) of the crystal structure of **PPIA**

| Crystal     | $\theta_{12}$ (°) | $\theta_{13}$ (°) | $\theta_{14}$ (°) | $\theta_{23}$ (°) | $\theta_{24}$ (°) | $\theta_{34}$ (°) |
|-------------|-------------------|-------------------|-------------------|-------------------|-------------------|-------------------|
| <b>PPIA</b> | 52.0              | 78.9              | 77.5              | 84.7              | 73.8              | 12.6              |

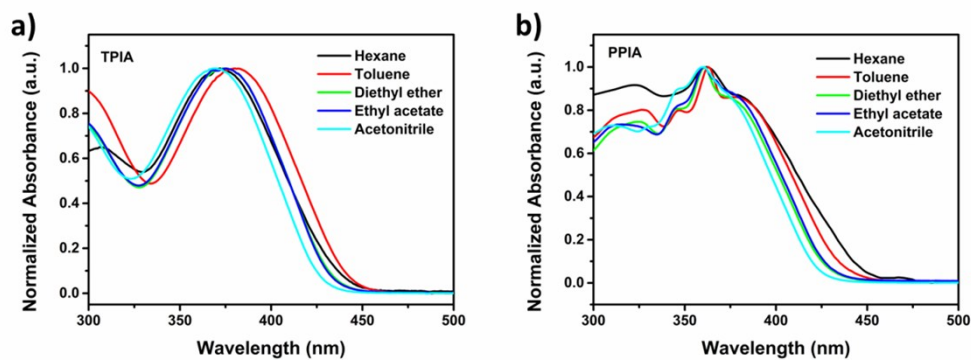

**Fig. S2** Normalized absorption spectra of **TPIA** and **PPIA** in different solvents.

**Table S2** Absorption and emission maxima of **TPIA** and **PPIA** in different solvents

| Solvent     |                             | Hexane | Toluene | Diethyl ether | Ethyl acetate | Acetonitrile |
|-------------|-----------------------------|--------|---------|---------------|---------------|--------------|
| <b>TPIA</b> | $\lambda_{\text{abs}}$ (nm) | 372    | 380     | 374           | 375           | 370          |
|             | $\lambda_{\text{em}}$ (nm)  | 494    | 544     | 586           | 603           | 628          |
| <b>PPIA</b> | $\lambda_{\text{abs}}$ (nm) | 362    | 363     | 361           | 360           | 360          |
|             | $\lambda_{\text{em}}$ (nm)  | 528    | 556     | 580           | 601           | 624          |

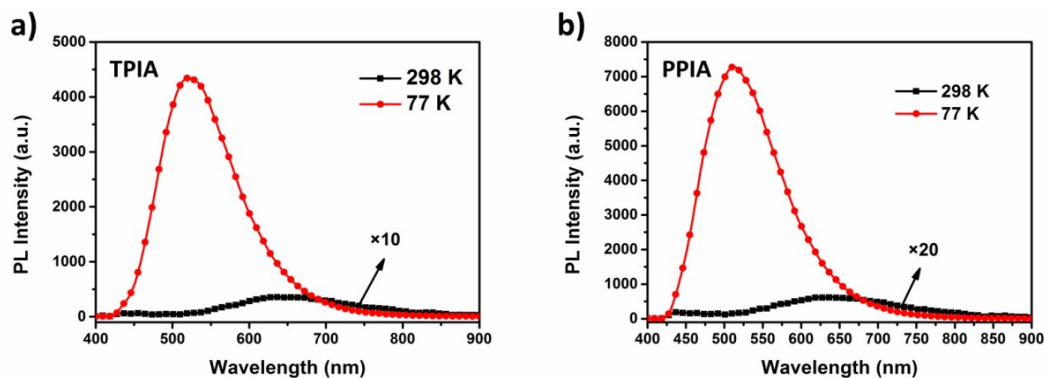

Fig. S3 PL spectra of **TPIA** and **PPIA** in THF at room temperature and 77 K.

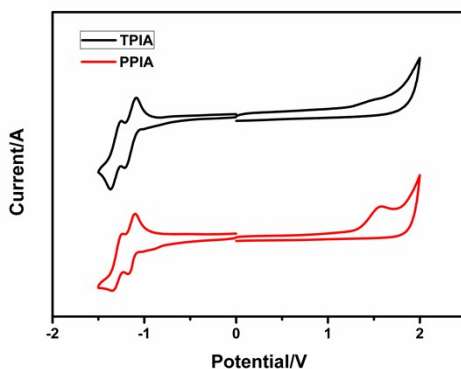

Fig. S4 Cyclic voltammograms of **TPIA** and **PPIA** in  $\text{CH}_2\text{Cl}_2$ , measured with 0.1 M  $n\text{-Bu}_4\text{NPF}_6$  as the supporting electrolyte at a scan rate of  $100 \text{ mV s}^{-1}$ .

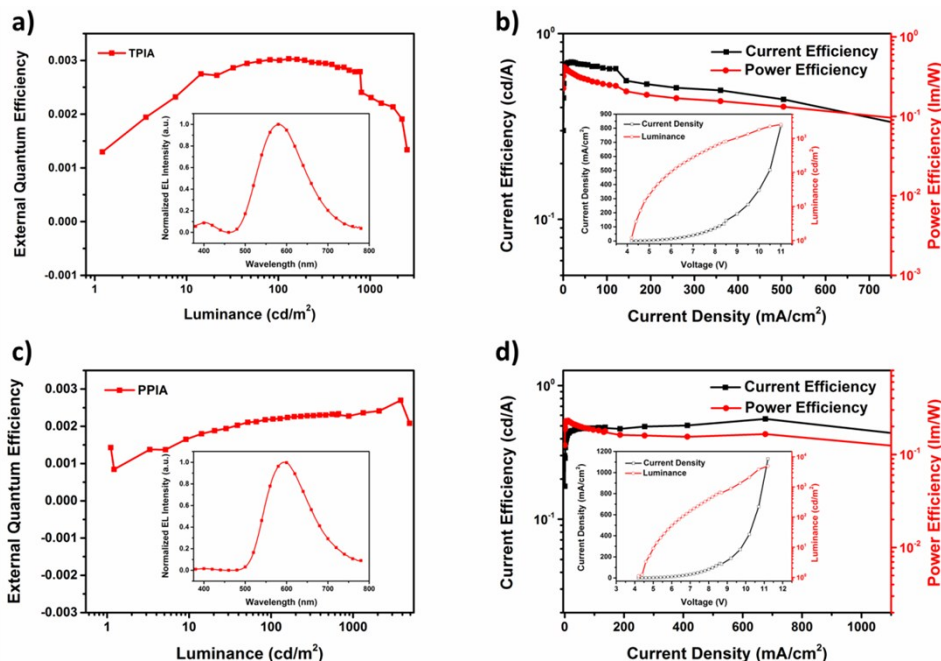

Fig. S5 (a: **TPIA**, c: **PPIA**) External quantum efficiency with the luminance and EL spectrum (Inset) of the fabricated OLED device I. (b: **TPIA**, d: **PPIA**) Current efficiency-current density-power efficiency curves and current-voltage-luminance characteristic curves (Inset) of the fabricated OLED device I. Device I configuration: ITO/HATCN (5 nm)/NPB (40 nm)/emitting layer (20 nm)/TPBi (40 nm)/LiF/Al.

**Table S3:** Crystal data and structure refinement results of **PPIA**

| <b>PPIA</b>                                       |                                                               |
|---------------------------------------------------|---------------------------------------------------------------|
| CCDC                                              | 1862218                                                       |
| empirical formula                                 | C <sub>72</sub> H <sub>54</sub> N <sub>8</sub> O <sub>2</sub> |
| formula wt                                        | 1063.23                                                       |
| <i>T</i> , K                                      | 173(2)                                                        |
| crystal system                                    | Triclinic                                                     |
| space group                                       | <i>P</i> -1                                                   |
| <i>a</i> , Å                                      | 10.123(2)                                                     |
| <i>b</i> , Å                                      | 11.857(2)                                                     |
| <i>c</i> , Å                                      | 12.208(2)                                                     |
| $\alpha$ , degree                                 | 107.99(2)                                                     |
| $\beta$ , degree                                  | 99.32(2)                                                      |
| $\gamma$ , degree                                 | 97.49(2)                                                      |
| <i>V</i> , Å <sup>3</sup>                         | 1349.7(5)                                                     |
| <i>Z</i>                                          | 1                                                             |
| density, Mg/m <sup>3</sup>                        | 1.308                                                         |
| <i>M</i> (Mo K $\alpha$ ), mm <sup>-1</sup>       | 0.080                                                         |
| $\theta$ range, degree                            | 2.50-28.32                                                    |
| no. of reflns collected                           | 9082                                                          |
| no. of unique reflns                              | 6357                                                          |
| <i>R</i> (int)                                    | 0.0153                                                        |
| GOF                                               | 0.931                                                         |
| <i>R</i> 1 [ <i>I</i> > 2 $\sigma$ ( <i>I</i> )]  | 0.0469                                                        |
| <i>wR</i> 2 [ <i>I</i> > 2 $\sigma$ ( <i>I</i> )] | 0.1281                                                        |
| <i>R</i> 1 (all data)                             | 0.0581                                                        |
| <i>wR</i> 2 (all data)                            | 0.1400                                                        |

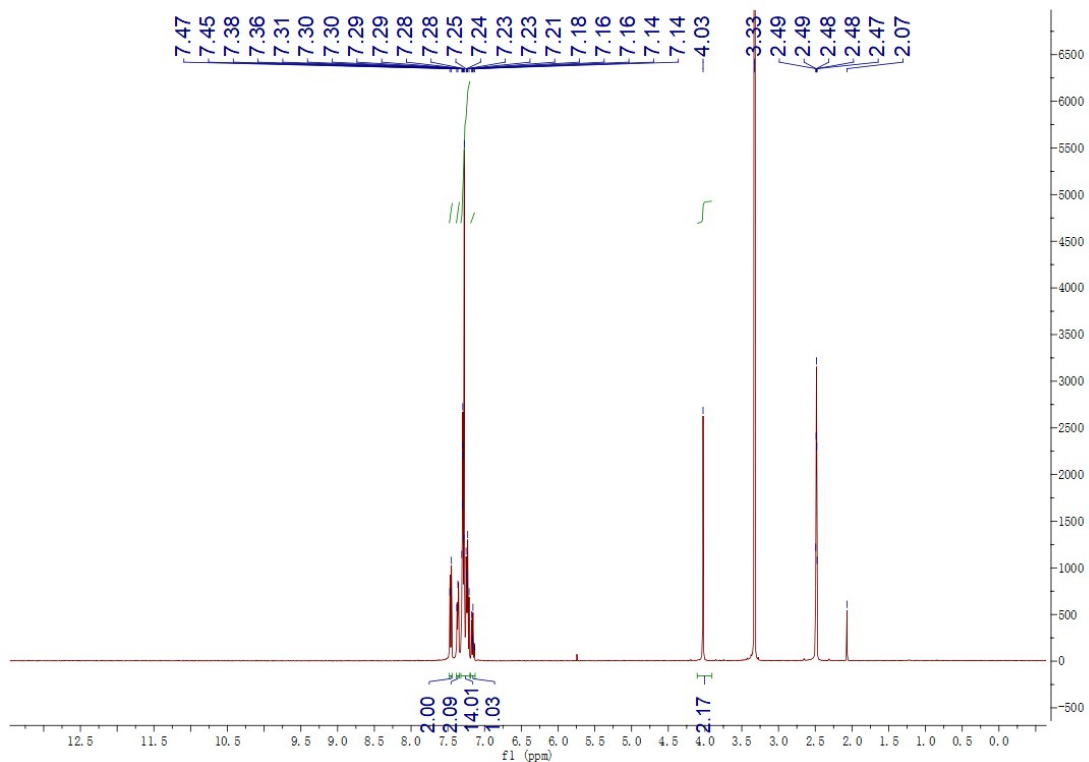

**Fig. S6.**  $^1\text{H}$  NMR spectrum of compound CN-1.

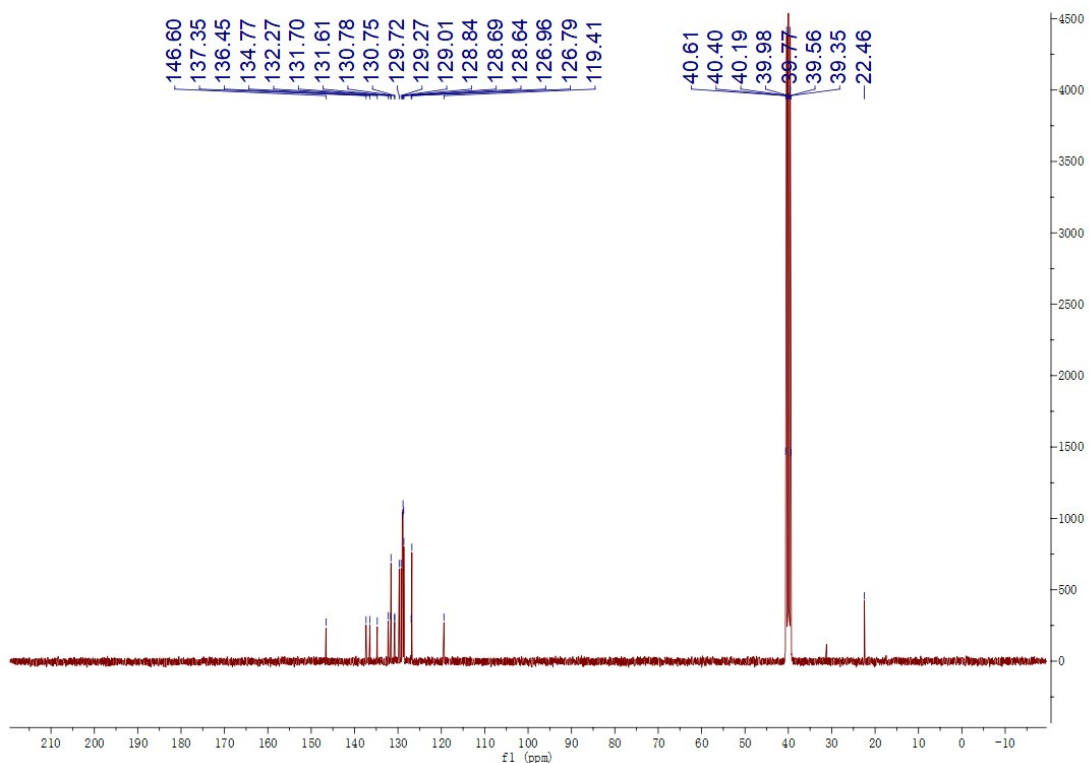

**Fig. S7.**  $^{13}\text{C}$  NMR spectrum of compound CN-1.

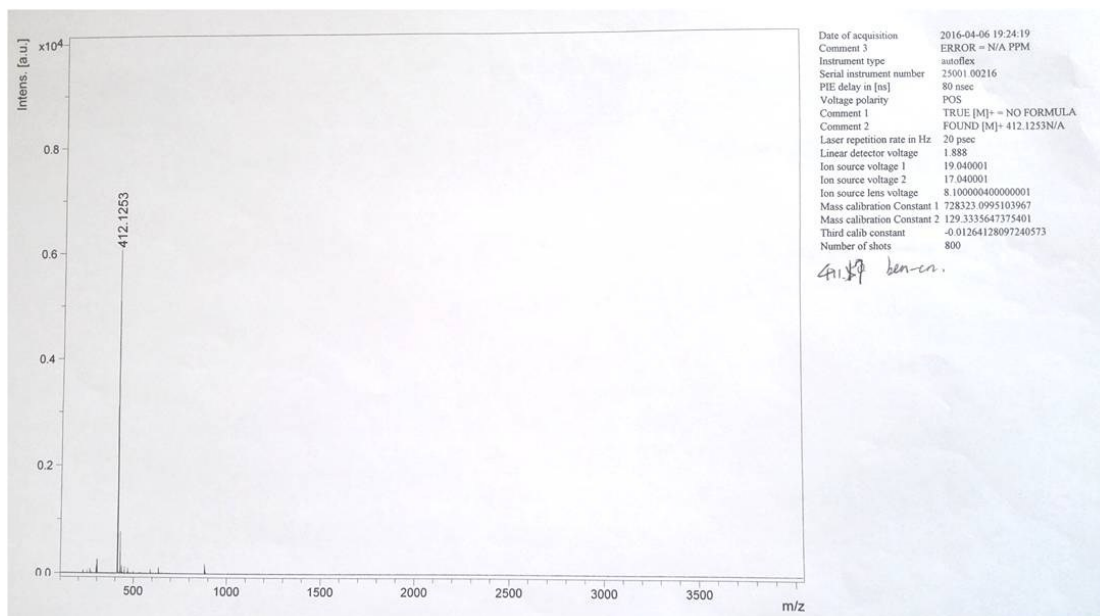

**Fig. S8.** Mass spectrum of compound CN-1.

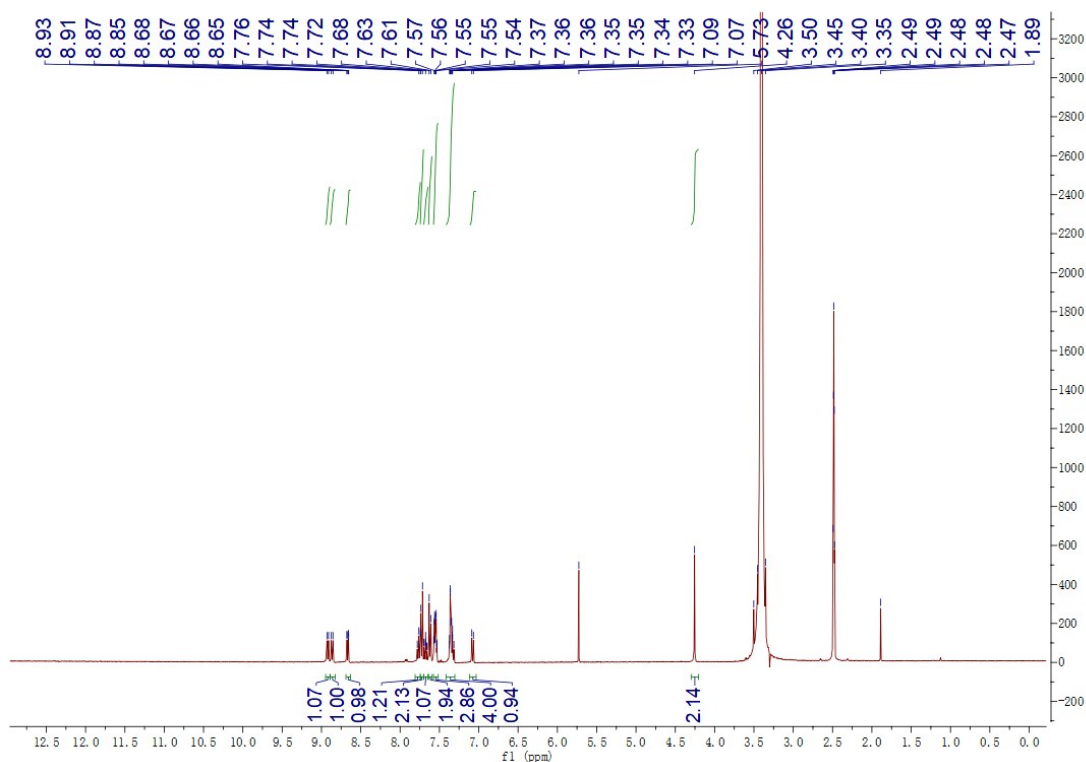

**Fig. S9.** <sup>1</sup>H NMR spectrum of compound CN-2.

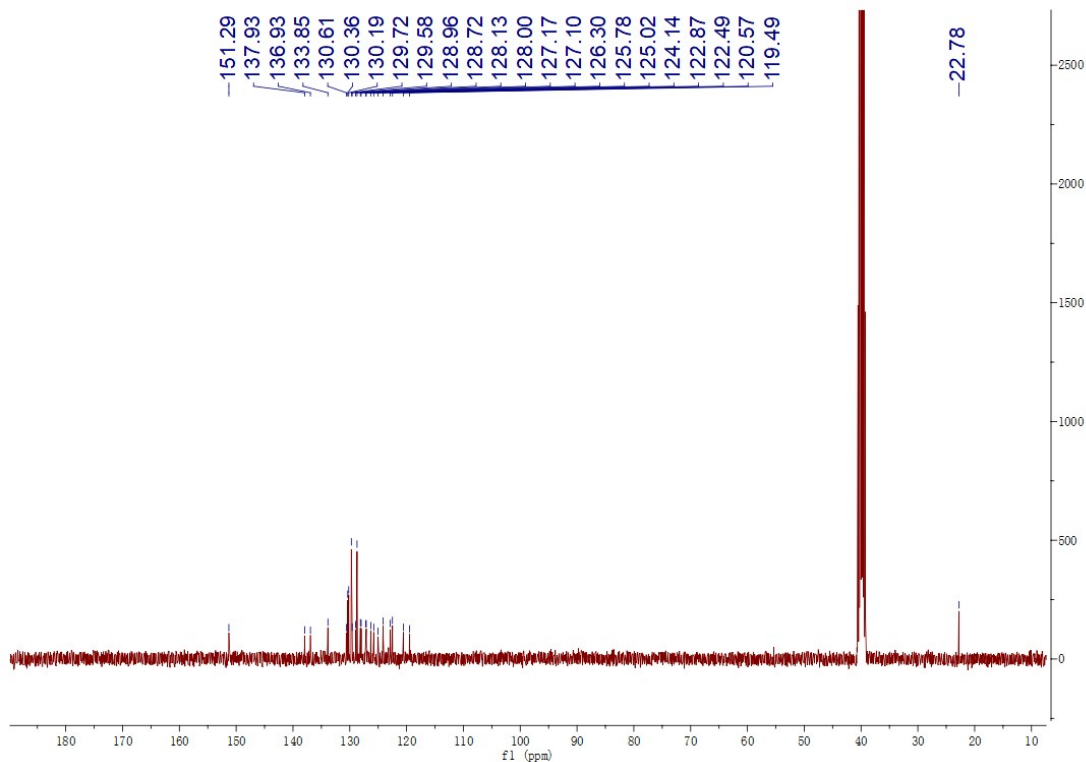

Fig. S10.  $^{13}\text{C}$  NMR spectrum of compound CN-2.

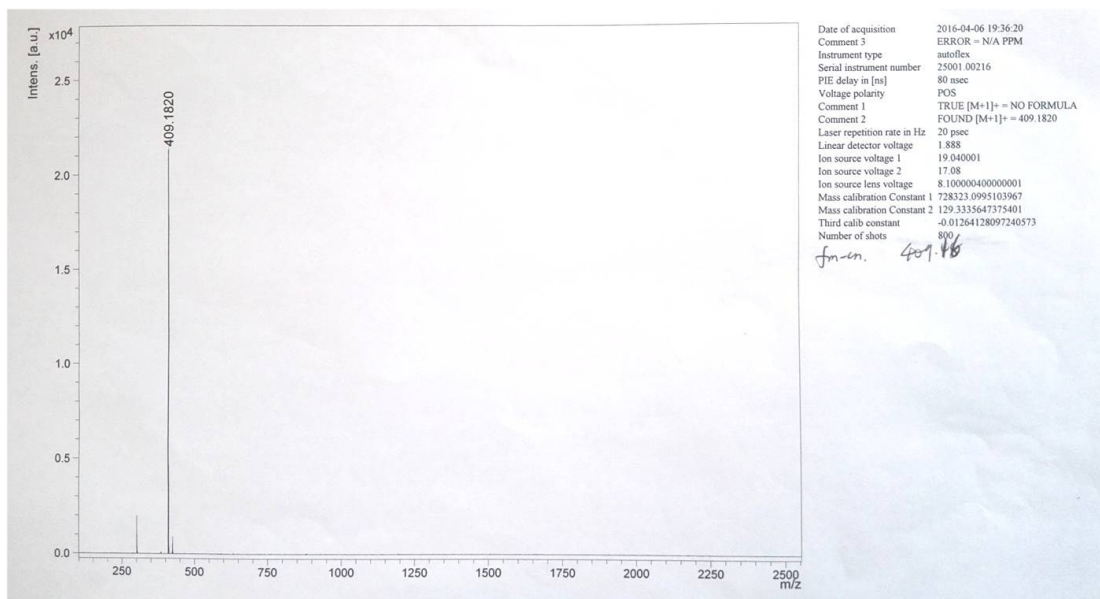

Fig. S11. Mass spectrum of compound CN-2.

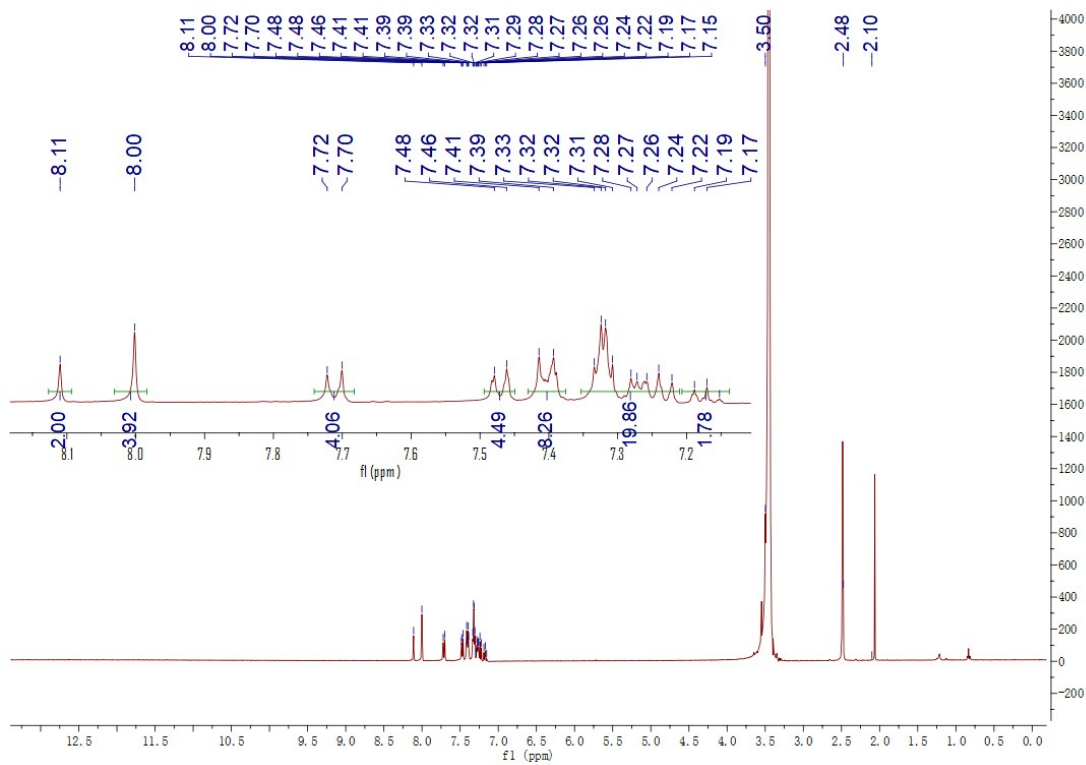

**Fig. S12.**  $^1\text{H}$  NMR spectrum of compound TPIA.

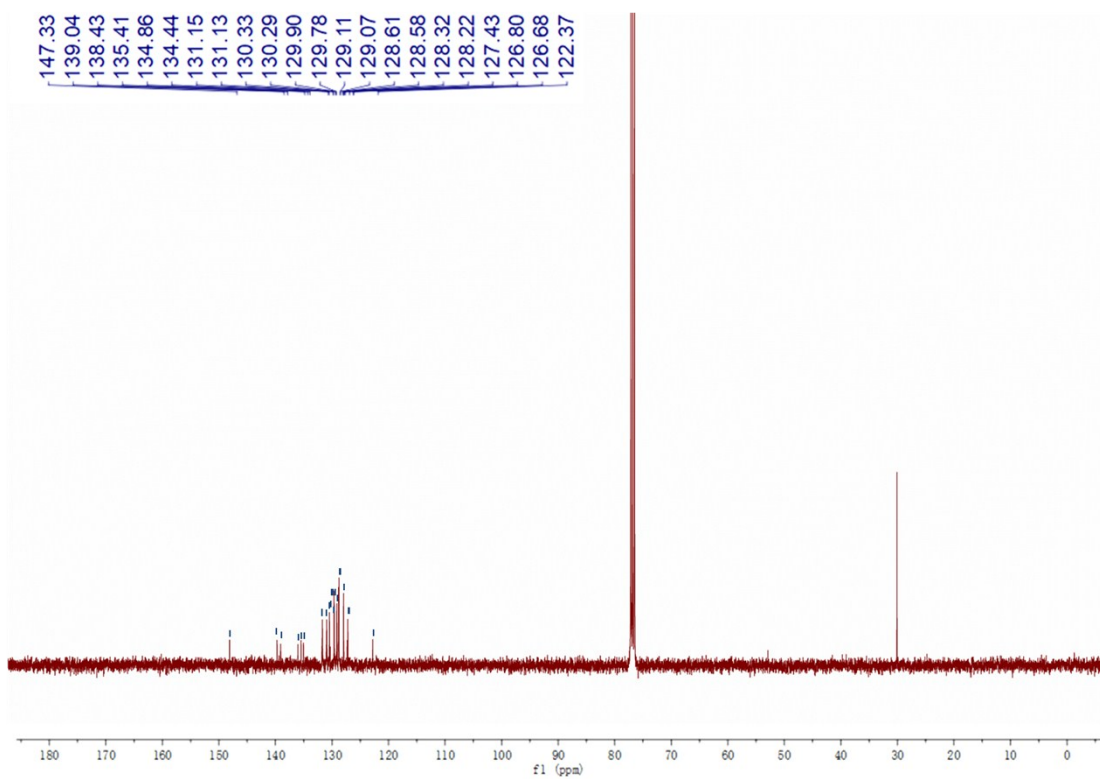

**Fig. S13.**  $^{13}\text{C}$  NMR spectrum of compound TPIA.



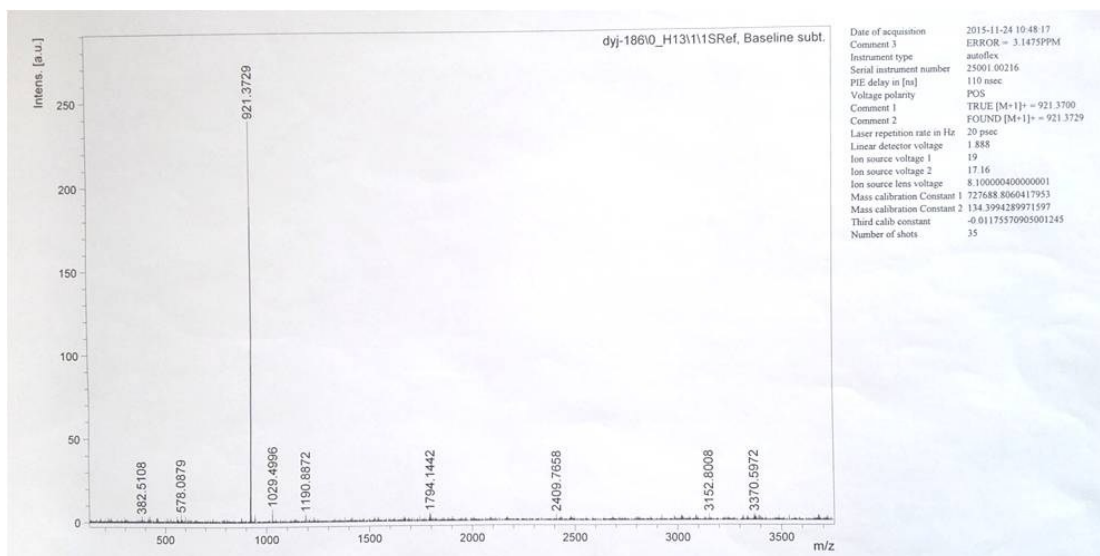

**Fig. S14.** Mass spectrum of compound TPIA.

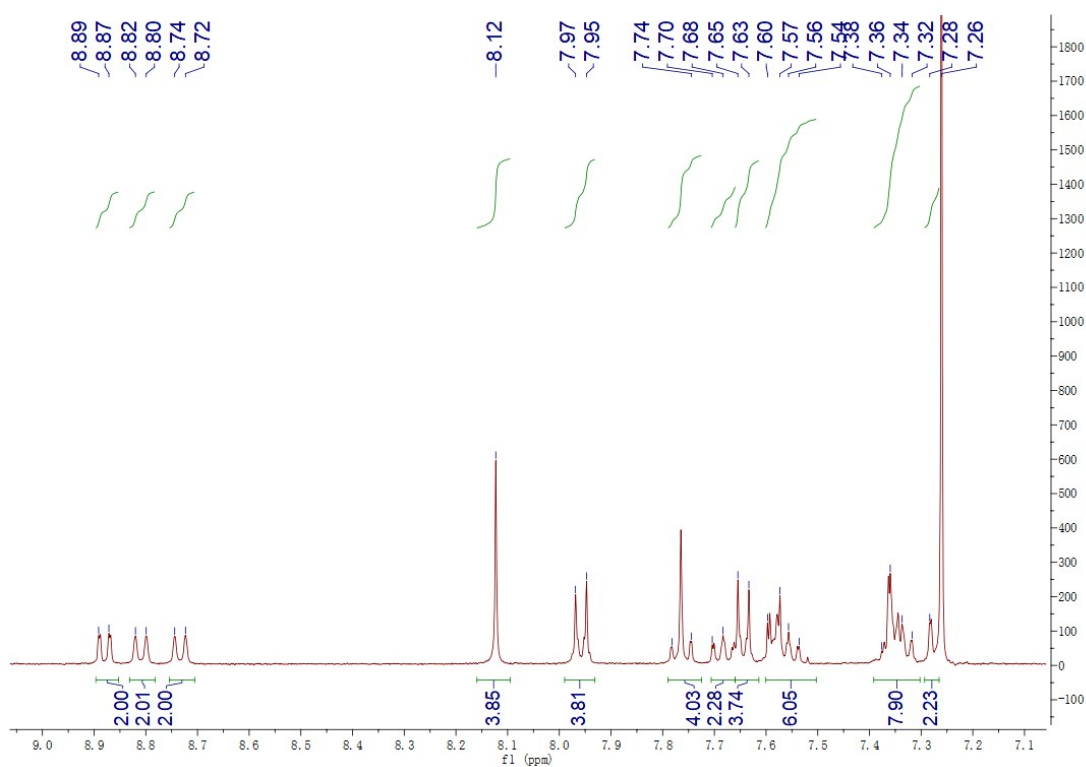

**Fig. S15.** <sup>1</sup>H NMR spectrum of compound PPIA.

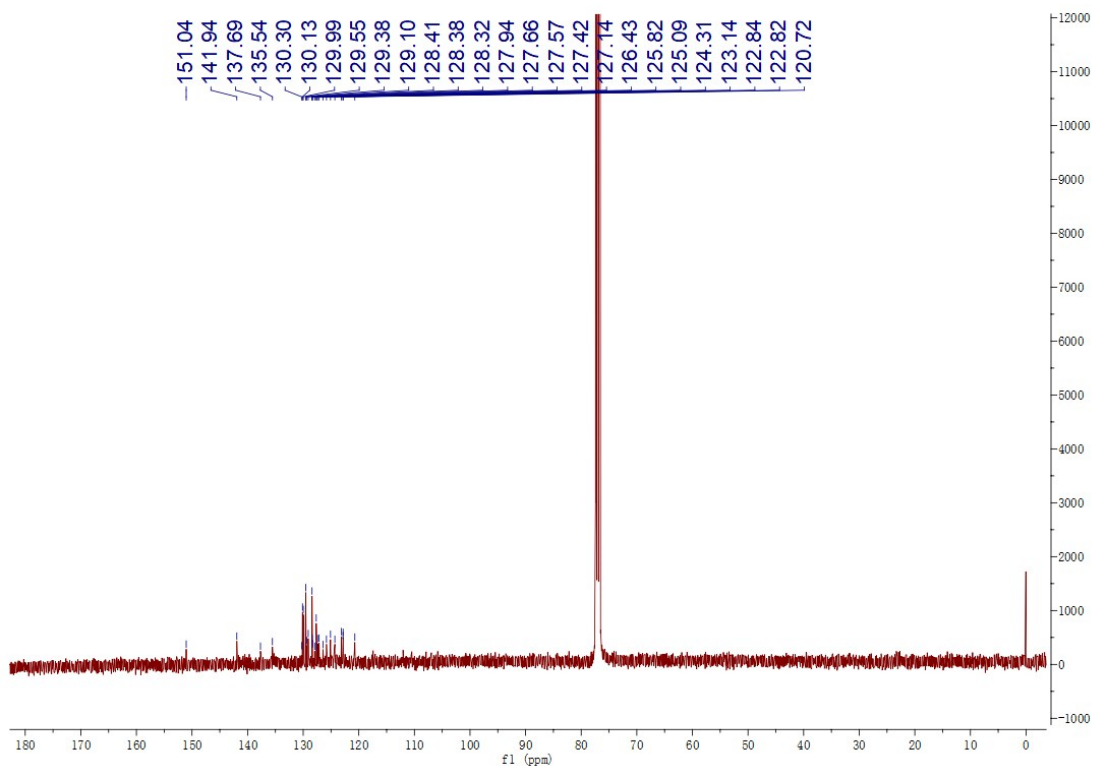

Fig. S16.  $^{13}\text{C}$  NMR spectrum of compound PPIA.

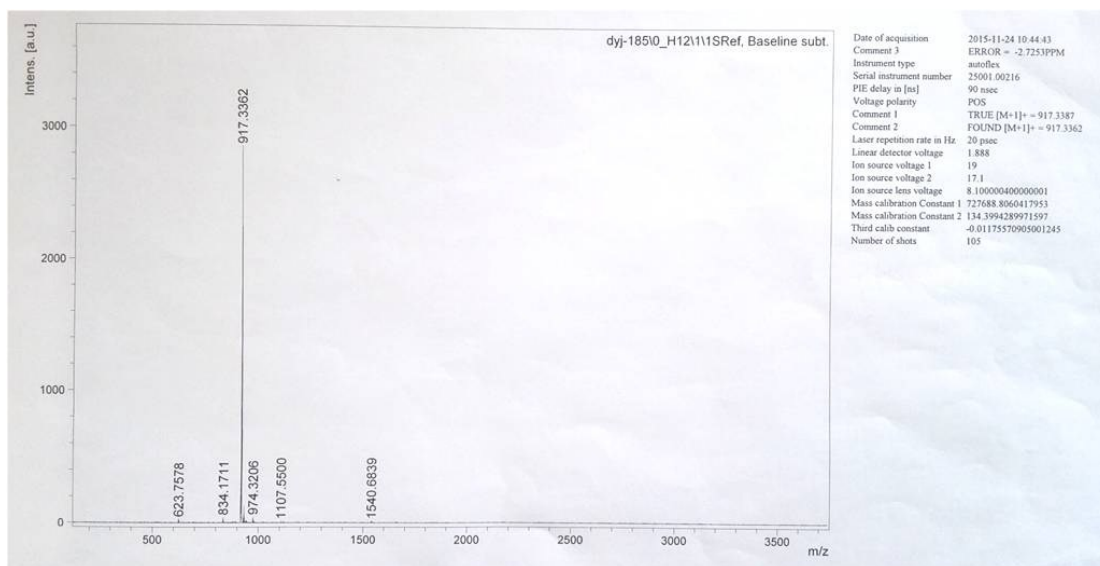

Fig. S17. Mass spectrum of compound PPIA.
